# Supplementary material for: Sequential simulation (SqS) of clinical pathways: a tool for public and patient engagement in point-of-care diagnostics
Source: PubMed Central journal article supplement (PMC5030544; doi:10.1136/bmjopen-2016-011043), 2016-09-13
Supplement: bmjopen-2016-011043supp_appendix2.pdf [file bmjopen-2016-011043supp_appendix2.pdf]

## Appendix 2 Post-event Questionnaire

### Post-Event Feedback Form

We would like to thank you for attendance and participation today. We welcome your comments about today's event.

When you complete the questionnaire please pass it to your facilitator at the end of the day.

|                |                                     |                                                 |                                       |                                   |
|----------------|-------------------------------------|-------------------------------------------------|---------------------------------------|-----------------------------------|
| <b>I am a:</b> | Patient<br><input type="checkbox"/> | Relative of Patient<br><input type="checkbox"/> | Clinician<br><input type="checkbox"/> | Other<br><input type="checkbox"/> |
|                |                                     |                                                 | Role:                                 | Role:                             |

In regards the diagnosis of Oesophago-gastric Cancer:

|                                                                                                    | Strongly Agree           | Agree                    | Neither agree and disagree | Disagree                 | Strongly Disagree        |
|----------------------------------------------------------------------------------------------------|--------------------------|--------------------------|----------------------------|--------------------------|--------------------------|
| I like the idea of a breath test for oesophago-gastric cancer.                                     | <input type="checkbox"/> | <input type="checkbox"/> | <input type="checkbox"/>   | <input type="checkbox"/> | <input type="checkbox"/> |
| I would prefer a breath test to a urine test.                                                      | <input type="checkbox"/> | <input type="checkbox"/> | <input type="checkbox"/>   | <input type="checkbox"/> | <input type="checkbox"/> |
| If I had symptoms I would like a breath test before an endoscopy.                                  | <input type="checkbox"/> | <input type="checkbox"/> | <input type="checkbox"/>   | <input type="checkbox"/> | <input type="checkbox"/> |
| Having a breath test would add to my anxiety.                                                      | <input type="checkbox"/> | <input type="checkbox"/> | <input type="checkbox"/>   | <input type="checkbox"/> | <input type="checkbox"/> |
| The breath test machine should tell patients if they are 'high risk' or 'low risk' for cancer.     | <input type="checkbox"/> | <input type="checkbox"/> | <input type="checkbox"/>   | <input type="checkbox"/> | <input type="checkbox"/> |
| Breath tests should only be performed in a hospital by a specialist.                               | <input type="checkbox"/> | <input type="checkbox"/> | <input type="checkbox"/>   | <input type="checkbox"/> | <input type="checkbox"/> |
| If I had a 'low risk' breath test I would be reassured and happy not to see a hospital specialist. | <input type="checkbox"/> | <input type="checkbox"/> | <input type="checkbox"/>   | <input type="checkbox"/> | <input type="checkbox"/> |
| Test devices that can give instant results are better for patients.                                | <input type="checkbox"/> | <input type="checkbox"/> | <input type="checkbox"/>   | <input type="checkbox"/> | <input type="checkbox"/> |
| I would like my GP to have more rapid result diagnostic tests.                                     | <input type="checkbox"/> | <input type="checkbox"/> | <input type="checkbox"/>   | <input type="checkbox"/> | <input type="checkbox"/> |
| I would prefer to be have rapid tests at my GP so I don't need to visit hospitals.                 | <input type="checkbox"/> | <input type="checkbox"/> | <input type="checkbox"/>   | <input type="checkbox"/> | <input type="checkbox"/> |

In regards to today's event:

|                                                                                       | Strongly Agree           | Agree                    | Neither agree and disagree | Disagree                 | Strongly Disagree        |
|---------------------------------------------------------------------------------------|--------------------------|--------------------------|----------------------------|--------------------------|--------------------------|
| The day was a useful experience.                                                      | <input type="checkbox"/> | <input type="checkbox"/> | <input type="checkbox"/>   | <input type="checkbox"/> | <input type="checkbox"/> |
| I enjoyed the opportunity to contribute to cutting edge research.                     | <input type="checkbox"/> | <input type="checkbox"/> | <input type="checkbox"/>   | <input type="checkbox"/> | <input type="checkbox"/> |
| More medical research should be presented in this way.                                | <input type="checkbox"/> | <input type="checkbox"/> | <input type="checkbox"/>   | <input type="checkbox"/> | <input type="checkbox"/> |
| Diagnostic test devices will be better if patients are involved in their development. | <input type="checkbox"/> | <input type="checkbox"/> | <input type="checkbox"/>   | <input type="checkbox"/> | <input type="checkbox"/> |

|                                                       |                          |                          |                          |                          |                          |
|-------------------------------------------------------|--------------------------|--------------------------|--------------------------|--------------------------|--------------------------|
| The presentations were at a level I could understand. | <input type="checkbox"/> | <input type="checkbox"/> | <input type="checkbox"/> | <input type="checkbox"/> | <input type="checkbox"/> |
| The speakers were of good quality.                    | <input type="checkbox"/> | <input type="checkbox"/> | <input type="checkbox"/> | <input type="checkbox"/> | <input type="checkbox"/> |
| I felt able to contribute to the discussion.          | <input type="checkbox"/> | <input type="checkbox"/> | <input type="checkbox"/> | <input type="checkbox"/> | <input type="checkbox"/> |

Other questions:

One thing I enjoyed most about today:

One thing I would change about today:

My thoughts on the breath test:

Thank you for your feedback.
