# Supplementary material for: Sequential simulation (SqS) of clinical pathways: a tool for public and patient engagement in point-of-care diagnostics
Source: BMJ Open. 2016 Sep 13;6(9):e011043. doi: 10.1136/bmjopen-2016-011043 (PMC5030544; doi:10.1136/bmjopen-2016-011043)
Supplement: Supplementary appendix [file bmjopen-2016-011043supp_appendix1.pdf]

## Appendix 1 Pre-event Questionnaire

### Pre-Event Feedback Form

We would like to thank you for attendance and participation today. We would like to gauge your understanding of issues described in today's events before the day commences.

When you complete the questionnaire please pass it to your facilitator at the end of the day.

|                |                                     |                                                 |                                       |                                   |
|----------------|-------------------------------------|-------------------------------------------------|---------------------------------------|-----------------------------------|
| <b>I am a:</b> | Patient<br><input type="checkbox"/> | Relative of Patient<br><input type="checkbox"/> | Clinician<br><input type="checkbox"/> | Other<br><input type="checkbox"/> |
|                |                                     |                                                 | Role:                                 | Role:                             |

In regards the diagnosis of Oesophago-gastric Cancer:

|                                                                                    | Strongly Agree           | Agree                    | Neither agree and disagree | Disagree                 | Strongly Disagree        |
|------------------------------------------------------------------------------------|--------------------------|--------------------------|----------------------------|--------------------------|--------------------------|
| I have a clear understanding of the care pathway for Oesophago-gastric Cancer      | <input type="checkbox"/> | <input type="checkbox"/> | <input type="checkbox"/>   | <input type="checkbox"/> | <input type="checkbox"/> |
| I have personal or family experience of Oesophago-gastric Cancer                   | <input type="checkbox"/> | <input type="checkbox"/> | <input type="checkbox"/>   | <input type="checkbox"/> | <input type="checkbox"/> |
| The current system can cause anxiety                                               | <input type="checkbox"/> | <input type="checkbox"/> | <input type="checkbox"/>   | <input type="checkbox"/> | <input type="checkbox"/> |
| Test devices that can give instant results are better for patients.                | <input type="checkbox"/> | <input type="checkbox"/> | <input type="checkbox"/>   | <input type="checkbox"/> | <input type="checkbox"/> |
| I would like my GP to have more rapid result diagnostic tests.                     | <input type="checkbox"/> | <input type="checkbox"/> | <input type="checkbox"/>   | <input type="checkbox"/> | <input type="checkbox"/> |
| I would prefer to be have rapid tests at my GP so I don't need to visit hospitals. | <input type="checkbox"/> | <input type="checkbox"/> | <input type="checkbox"/>   | <input type="checkbox"/> | <input type="checkbox"/> |

How much do you know about the term Sequential Simulation (SqS)?

No idea ☐                      Some idea ☐                      A lot ☐

Comments:

---

---

---

---

How much do you know about how different parts of healthcare systems link up?

Nothing ☐                      A little bit ☐                      A lot ☐

Comments:

---

---

---

---

My understanding of today's event is...

Thank you for your feedback.
